# Supplementary figures and images for: Exploring the problem of determining human age from fingermarks using MALDI MS-machine learning combined approaches
Source: Royal Society of Chemistry journal article supplement (doi:10.1039/d1ay02002a), 2022-01-01

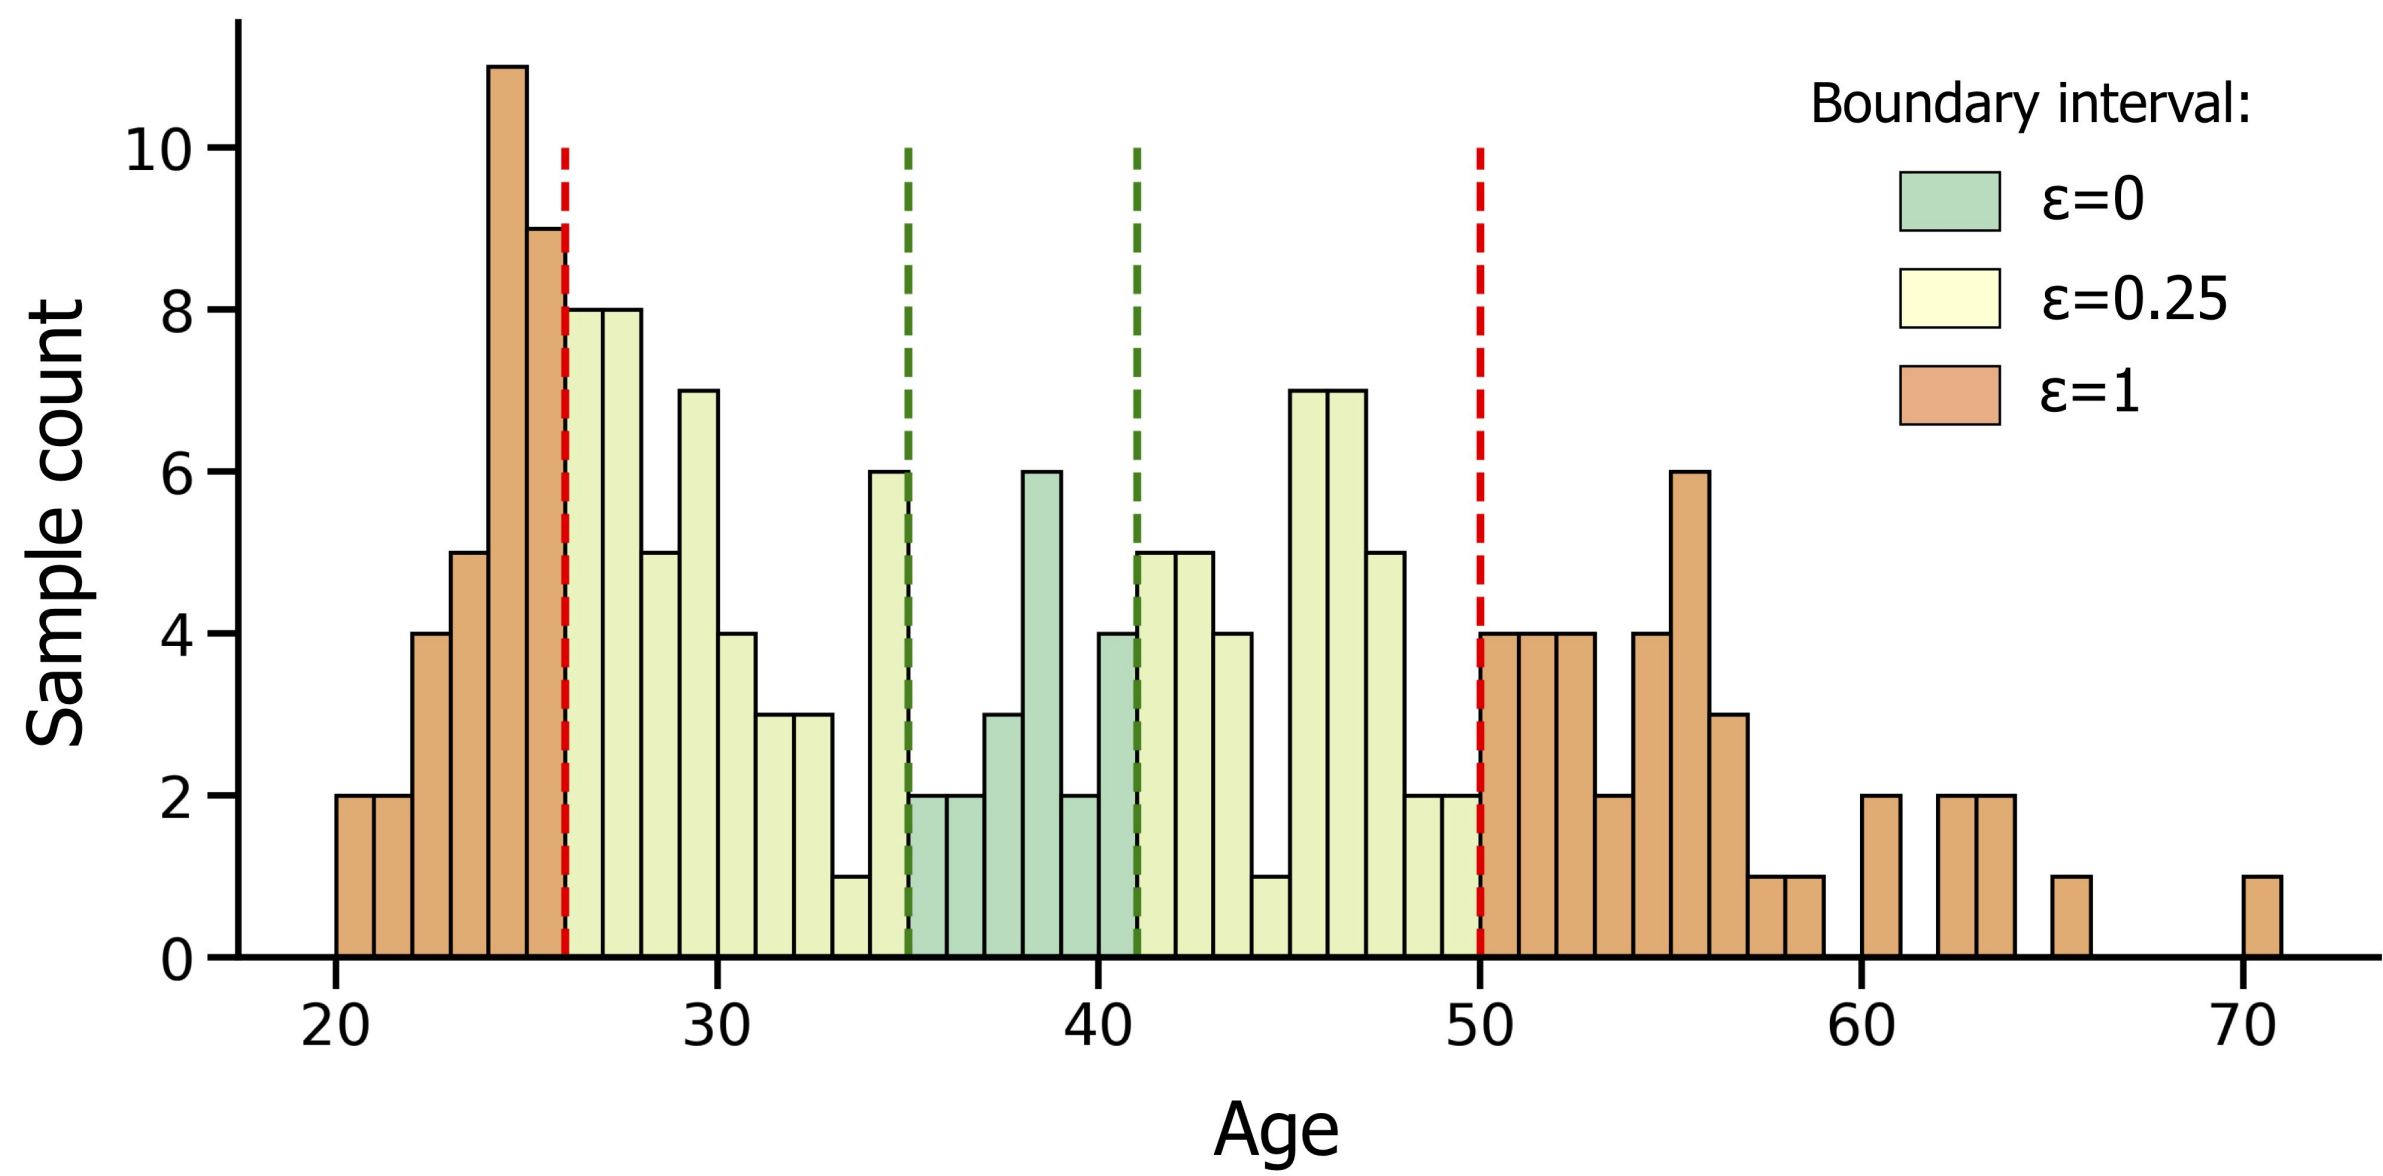

Supplement: d1ay02002a2.pdf [file d1ay02002a2.pdf]
